# Supplementary material for: Cost-Effectiveness Analysis of COVID-19 Inactivated Vaccines in Reducing the Economic Burden of Ischaemic Stroke after SARS-CoV-2 Infection
Source: MDPI journal article supplement (doi:10.3390/vaccines11050957), 2023-05-07
Supplement: s1 [file s1]

**Table S1 Base-case and plausible ranges of model inputs on transition probabilities**

| <b>Model input</b>                                                 | <b>Base case</b>                                                                      | <b>Range</b>                                                                                            | <b>Reference</b> |
|--------------------------------------------------------------------|---------------------------------------------------------------------------------------|---------------------------------------------------------------------------------------------------------|------------------|
| Proportion of older patients                                       | 30.2%                                                                                 | 0~100%                                                                                                  | [1]              |
| Proportion of two-dose inactivated vaccination                     | Young people: 90.0%; Older people: 96.6%                                              | 0~100%                                                                                                  | [2]              |
| Proportion of symptomatic COVID-19                                 | Young people: 66.7%; Older people: 66.2%                                              |                                                                                                         | [3]              |
| Proportion of severe COVID-19                                      | Young people: 8.0%; Older people: 18.7%                                               |                                                                                                         | [4]              |
| Proportion of critical COVID-19                                    | Young people: 2.0%; Older people: 10.6%                                               |                                                                                                         | [4]              |
| Proportion of critical COVID-19 to death                           | Young people: 0.63%; Older people: 5.96%                                              |                                                                                                         | [5]              |
| Ischaemic stroke incidence rate after SARS-Cov-2 infection         | Mild/moderate COVID-19: 0.2%; Severe COVID-19: 0.4%; Critical COVID-19: 0.5%          |                                                                                                         | [6]              |
| Proportion of different outcomes of ischaemic stroke at first year | mRS 0-2: 79.6%; mRS 3-5: 13.7%; mRS 6 (death): 6.7%; Recurrent ischaemic stroke: 6.7% | mRS 0-2: 78.0~81.2%; mRS 3-5: 12.4~15.2%; mRS 6 (death): 5.7~7.7%; Recurrent ischaemic stroke: 5.7~7.7% | [7]              |
| Relative risk of stroke recurrence per life-year                   | 1.03                                                                                  | 1.02~1.04                                                                                               | [7]              |
| Relative risk of natural death for mRS 3–5 state                   | 1.68                                                                                  | 1.49-1.92                                                                                               | [8]              |
| Proportion of patients in recurrent stroke                         | mRS 0-2: 53.4%; mRS 3-5: 32.4%; mRS 6 (death): 14.2%                                  | mRS 0-2: 47.0~59.6%; mRS 3-5: 26.7~38.6%; mRS 6 (death): 10.2~19.2%;                                    | [8]              |
| Age- specific death rates                                          | See 2020 Census data                                                                  | -                                                                                                       | [9]              |

mRS, modified Rankin Scale.

**Table S2 Base-case and plausible ranges of model inputs on vaccine effectiveness, costs and health utilities**

| Model input                               | Base case                                                                                                                       | Range                                                                                                                                                              | Reference |
|-------------------------------------------|---------------------------------------------------------------------------------------------------------------------------------|--------------------------------------------------------------------------------------------------------------------------------------------------------------------|-----------|
| <b>Vaccine effectiveness</b>              |                                                                                                                                 |                                                                                                                                                                    |           |
| Two-dose inactivated vaccination efficacy | Symptomatic COVID-19: 75.0%; Severe COVID-19: 87.5%; Critical COVID-19: 90.3%; Death: 86.3%; Ischaemic stroke: 60.0%            | Symptomatic COVID-19: 65.0~83.0%; Severe COVID-19: 86.7~88.2%; Critical COVID-19: 89.1~91.4%; Death: 84.5~87.9%; Critical COVID-19 to ischaemic stroke: 37.0~74.0% | [10-12]   |
| <b>Cost inputs (2022 US\$)</b>            |                                                                                                                                 |                                                                                                                                                                    |           |
| Cost of two dose inactivated vaccines     | 11.8                                                                                                                            | 11.8-14.9                                                                                                                                                          | [13]      |
| Cost of COVID-19                          | Asymptomatic COVID-19: 813.2<br>Mild/moderate: COVID-19: 915.5; Severe: 8656.4; Critical: 24937.6; Natural death/alive/R0/R1: 0 |                                                                                                                                                                    | [14]      |
| Cost of ischaemic stroke                  | mRS 0–2: 16907.7; mRS 3–5: 18084.5; mRS 6: 15656.5                                                                              |                                                                                                                                                                    | [7, 8]    |
| <b>Utility inputs</b>                     |                                                                                                                                 |                                                                                                                                                                    |           |
| Utility of COVID-19                       | I0: 0.946; I1: 0.847<br>I2: 0.766; I3: 0.629; R0: 0.896; R1/alive: 1; natural death/D0/D1: 0                                    | I0: 0.946~1; I1: 0.762~0.932; I2: 0.689~0.843; I3: 0.566~0.692; R0 0.806~0.986                                                                                     | [15, 16]  |
| Utility of ischaemic stroke               | mRS 0–2: 0.76; mRS 3–5: 0.21; Death (mRS 6), 0                                                                                  | mRS 0–2: 0.69~0.82; mRS 3–5: 0.17~0.26;                                                                                                                            | [7]       |
| <b>Discount rate inputs</b>               |                                                                                                                                 |                                                                                                                                                                    |           |
| Costs                                     | 0.03                                                                                                                            | 0 ~0.06                                                                                                                                                            | [17, 18]  |
| Outcomes                                  | 0.03                                                                                                                            | 0~0.06                                                                                                                                                             | [17, 18]  |

mRS, modified Rankin Scale.

## Reference

1. The epidemiological characteristics of an outbreak of 2019 novel coronavirus diseases (COVID-19) in China. *Zhonghua Liu Xing Bing Xue Za Zhi*. 2020 Feb 10;41(2):145-51. PMID: 32064853. doi: 10.3760/cma.j.issn.0254-6450.2020.02.003.
2. CDC Weekly. Epidemic situation of COVID-19 in China. URL: [https://www.chinacdc.cn/jkzt/crb/zl/szkb\\_11803/jszl\\_13141/202302/t20230201\\_263576.html](https://www.chinacdc.cn/jkzt/crb/zl/szkb_11803/jszl_13141/202302/t20230201_263576.html) [accessed 2023-02-01]
3. Ma Q, Liu J, Liu Q, Kang L, Liu R, Jing W, et al. Global Percentage of Asymptomatic SARS-CoV-2 Infections Among the Tested Population and Individuals With Confirmed COVID-19 Diagnosis: A Systematic Review and Meta-analysis. *JAMA Netw Open*. 2021 Dec 1;4(12):e2137257. PMID: 34905008. doi: 10.1001/jamanetworkopen.2021.37257.
4. Geng M, Ren X, Yu J, Jiang R, Li Z, Feng Z, et al. Clinical characteristics of patients with COVID-19 in different age groups. *Disease Surveillance*. 2021;36(06):573-80.
5. Baggett TP, Scott JA, Le MH, Shebl FM, Panella C, Losina E, et al. Clinical Outcomes, Costs, and Cost-effectiveness of Strategies for Adults Experiencing Sheltered Homelessness During the COVID-19 Pandemic. *JAMA Netw Open*. 2020 Dec 1;3(12):e2028195. PMID: 33351082. doi: 10.1001/jamanetworkopen.2020.28195.
6. Wang M, Zhang H, He Y, Qin C, Liu X, Liu M, et al. Association Between Ischemic Stroke and COVID-19 in China: A Population-Based Retrospective Study. *Front Med (Lausanne)*. 2022 Feb 21;8:792487. PMID: 35265632. doi: 10.3389/fmed.2021.792487.
7. Wang Y, Li Z, Zhao X, Wang C, Wang X, Wang D, et al. Effect of a Multifaceted Quality Improvement Intervention on Hospital Personnel Adherence to Performance Measures in Patients With Acute Ischemic Stroke in China: A Randomized Clinical Trial. *Jama*. 2018 Jul 17;320(3):245-54. PMID: 29959443. doi: 10.1001/jama.2018.8802.
8. Han M, Qin Y, Tong X, Ji L, Zhao S, Liu L, et al. Cost-effective analysis of mechanical thrombectomy alone in the treatment of acute ischaemic stroke: a Markov modelling study. *BMJ open*. 2022 Apr 6;12(4):e059098. PMID: 35387833. doi: 10.1136/bmjopen-2021-059098.
9. China Population and Employment Statistics Yearbook: China Statistics Press; 2021.
10. Al Kaabi N, Zhang Y, Xia S, Yang Y, Al Qahtani MM, Abdulrazzaq N, et al. Effect of 2 Inactivated SARS-CoV-2 Vaccines on Symptomatic COVID-19 Infection in Adults: A Randomized Clinical Trial. *Jama*. 2021 Jul 6;326(1):35-45. PMID: 34037666. doi: 10.1001/jama.2021.8565.
11. Jara A, Undurraga EA, González C, Paredes F, Fontecilla T, Jara G, et al. Effectiveness of an Inactivated SARS-CoV-2 Vaccine in Chile. *The New England journal of medicine*. 2021 Sep 2;385(10):875-84. PMID: 34233097. doi: 10.1056/NEJMoa2107715.
12. Kim YE, Huh K, Park YJ, Peck KR, Jung J. Association Between Vaccination and Acute Myocardial Infarction and Ischemic Stroke After COVID-19 Infection. *Jama*. 2022 Sep 6;328(9):887-9. PMID: 35867050. doi: 10.1001/jama.2022.12992.
13. Fu Y, Zhao J, Wei X, Han P, Yang L, Ren T, et al. Cost-Effectiveness of COVID-19

Sequential Vaccination Strategies in Inactivated Vaccinated Individuals in China. *Vaccines*. 2022 Oct 14;10(10). PMID: 36298577. doi: 10.3390/vaccines10101712.

14. Jin H, Wang H, Li X, Zheng W, Ye S, Zhang S, et al. Economic burden of COVID-19, China, January-March, 2020: a cost-of-illness study. *Bull World Health Organ*. 2021 Feb 1;99(2):112-24. PMID: 33551505. doi: 10.2471/BLT.20.267112.

15. Alinia C, Yaghmaei S, Abdullah FZ, Ahmadi A, Samadi N, Pourteimour S, et al. The health-related quality of life in Iranian patients with COVID-19. *BMC infectious diseases*. 2021 May 20;21(1):459. PMID: 34016041. doi: 10.1186/s12879-021-06170-z.

16. Xie S, Wu J, Xie F. Population Norms for SF-6Dv2 and EQ-5D-5L in China. *Applied health economics and health policy*. 2022 Jul;20(4):573-85. PMID: 35132573. doi: 10.1007/s40258-022-00715-2.

17. World Health Organization WH. WHO GUIDE TO COST-EFFECTIVENESS ANALYSIS. URL: <https://apps.who.int/iris/bitstream/handle/10665/42699/9241546018.pdf?sequence=1&isAllowed=y>. [accessed 2023-02-07]

18. Jing W, Liu J, Wu Y, Ma Q, Liu M. Cost-effectiveness of couple-based immunization strategy to prevent mother-to-child transmission of hepatitis B virus in China: A decision-analytic Markov model. *EClinicalMedicine*. 2020 Feb;19:100264. PMID: 32055793. doi: 10.1016/j.eclinm.2020.100264.
